# Supplementary material for: Puncture mechanics of soft solids
Source: Royal Society of Chemistry journal article supplement (doi:10.1039/c5sm00230c), 2015-01-01

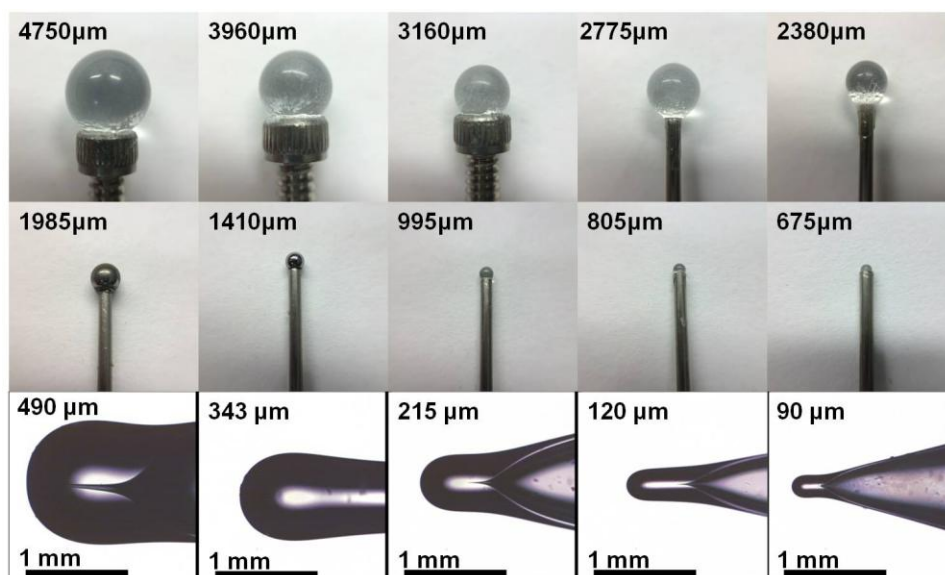

**ESI Fig. 1.** Images of spherically-tipped indenters. Rows 1 and 2 show indenters fabricated by gluing beads (no scale bars, labels indicate sphere radii), while row 3 shows indenters pulled and annealed in a microforge (scale bars indicate 1 mm, labels indicate tip radii).

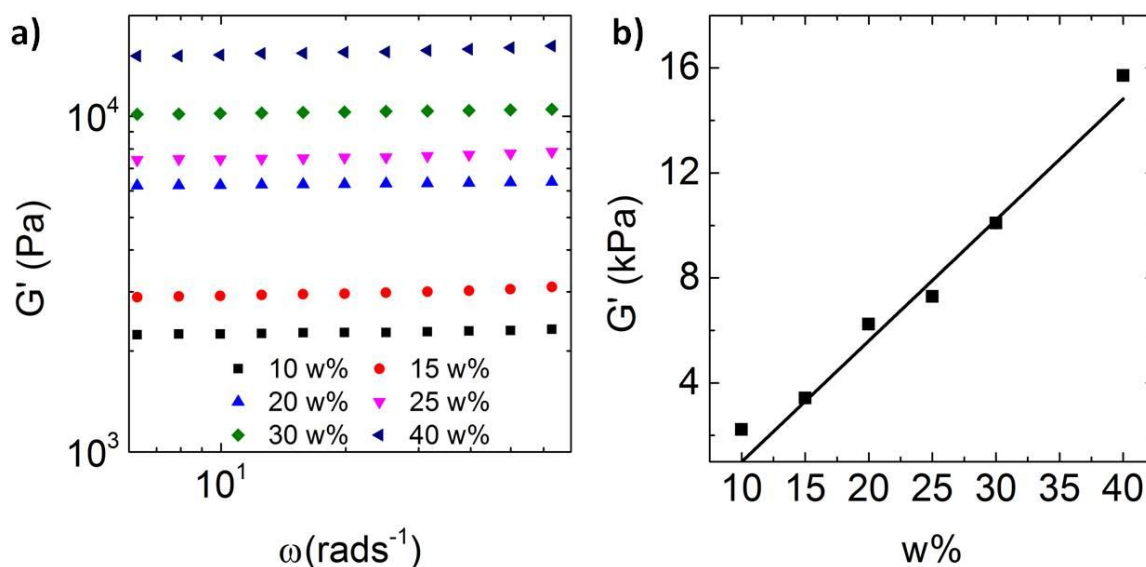

**ESI Fig. 2.** Shear rheology of triblock copolymer gels. (a) Parallel-plate shear rheology of  $A_{25} B_{116} A_{25}$  gels. Storage modulus is plotted versus angular frequency between 1 and 10 Hz. (b) Storage modulus,  $G'$ , averaged between 1 and 10 Hz versus weight percent polymer for  $A_{25} B_{116} A_{25}$  gels.

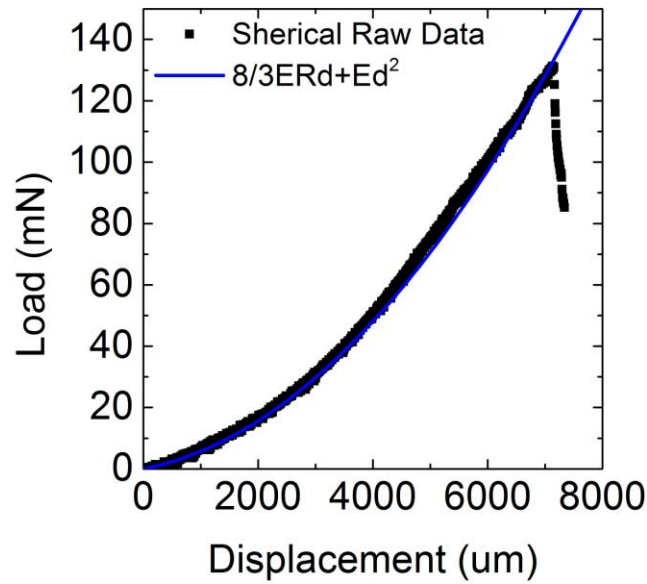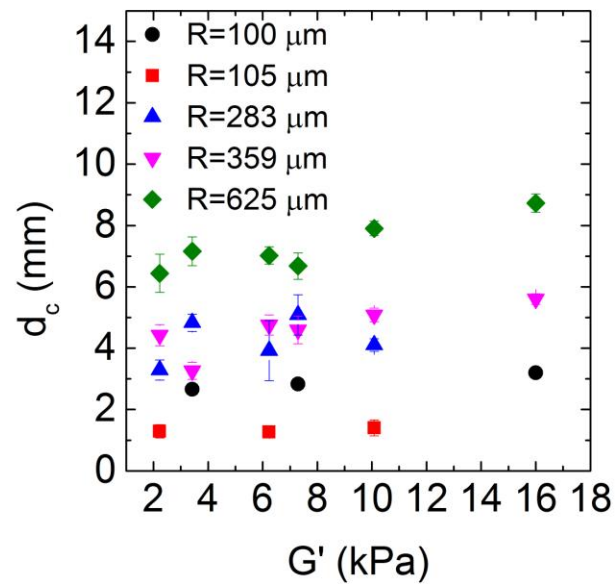

Supplement: c5sm00230c1.pdf [file c5sm00230c1.pdf]
